# Supplementary material for: Microfluidic-Assisted Formulation of ε-Polycaprolactone Nanoparticles and Evaluation of Their Properties and In Vitro Cell Uptake
Source: MDPI journal article supplement (doi:10.3390/polym15224375), 2023-11-10
Supplement: s1 [file s1]

# Supporting information for “Microfluidic-Assisted Formulation of $\epsilon$ -Polycaprolactone Nanoparticles and Evaluation of Their Properties and In Vitro and Cell Uptake”

Ewa Rybak <sup>1,\*</sup>, Piotr Kowalczyk <sup>1</sup>, Sylwia Czarnocka-Śniadała <sup>2</sup>, Michał Wojasiński <sup>1</sup>, Jakub Trzcinski <sup>1,3,†</sup> and Tomasz Ciach <sup>1,2,†</sup>

<sup>1</sup> Faculty of Chemical and Process Engineering, Warsaw University of Technology, Waryńskiego 1, 00-645 Warsaw, Poland; piotr.kowalczyk.dokt@pw.edu.pl (P.K.); michal.wojasinski@pw.edu.pl (M.W.); jakub.trzcinski@pw.edu.pl (J.T.); tomasz.ciach@pw.edu.pl (T.C.)

<sup>2</sup> Nanosanguis S.A., Rakowiecka 36, 02-532 Warsaw, Poland; s.czarnocka@nanogroup.eu

<sup>3</sup> Centre for Advanced Materials and Technologies CEZAMAT, Warsaw University of Technology, Poleczki 19, 02-822 Warsaw, Poland

\* Correspondence: ewa.rybak.dokt@pw.edu.pl

† These authors contributed equally to this work.

Table S1. Mean diameter and PDI of blank NPs. Size and polydispersity index (PDI) of PCL NPs measured by dynamic light scattering (DLS).

|                       | Dropwise                    |                   | Microfluidic device         |                   |
|-----------------------|-----------------------------|-------------------|-----------------------------|-------------------|
| PCL concentration [%] | Mean diameter $\pm$ SD [nm] | PDI [-]           | Mean diameter $\pm$ SD [nm] | PDI [-]           |
| 0.1                   | 122 $\pm$ 2                 | 0.183 $\pm$ 0.010 | 122 $\pm$ 1                 | 0.147 $\pm$ 0.010 |
| 0.5                   | 150 $\pm$ 4                 | 0.090 $\pm$ 0.008 | 140 $\pm$ 2                 | 0.150 $\pm$ 0.007 |
| 1.0                   | 189 $\pm$ 2                 | 0.146 $\pm$ 0.016 | 121 $\pm$ 4                 | 0.140 $\pm$ 0.008 |
| 2.0                   | 171 $\pm$ 3                 | 0.187 $\pm$ 0.011 | 184 $\pm$ 1                 | 0.060 $\pm$ 0.006 |
| 5.0                   | 139 $\pm$ 2                 | 0.252 $\pm$ 0.010 | 188 $\pm$ 3                 | 0.123 $\pm$ 0.020 |

Table S2. Comparison of dye-loaded NP characteristics formulated with analyzed methods. Size and polydispersity index (PDI) of PCL NPs with dye measured by dynamic light scattering (DLS).

|                       | Dropwise                    |                   | Microfluidic device         |                   |
|-----------------------|-----------------------------|-------------------|-----------------------------|-------------------|
| PCL concentration [%] | Mean diameter $\pm$ SD [nm] | PDI [-]           | Mean diameter $\pm$ SD [nm] | PDI [-]           |
| 0.1                   | 159 $\pm$ 3                 | 0.424 $\pm$ 0.069 | 167 $\pm$ 5                 | 0.201 $\pm$ 0.003 |
| 0.5                   | 136 $\pm$ 5                 | 0.585 $\pm$ 0.008 | 130 $\pm$ 2                 | 0.199 $\pm$ 0.004 |
| 1.0                   | 151 $\pm$ 0                 | 0.653 $\pm$ 0.002 | 127 $\pm$ 3                 | 0.180 $\pm$ 0.009 |
| 2.0                   | 185 $\pm$ 4                 | 0.154 $\pm$ 0.006 | 141 $\pm$ 5                 | 0.146 $\pm$ 0.013 |
| 5.0                   | 106 $\pm$ 2                 | 0.609 $\pm$ 0.004 | 193 $\pm$ 2                 | 0.214 $\pm$ 0.007 |

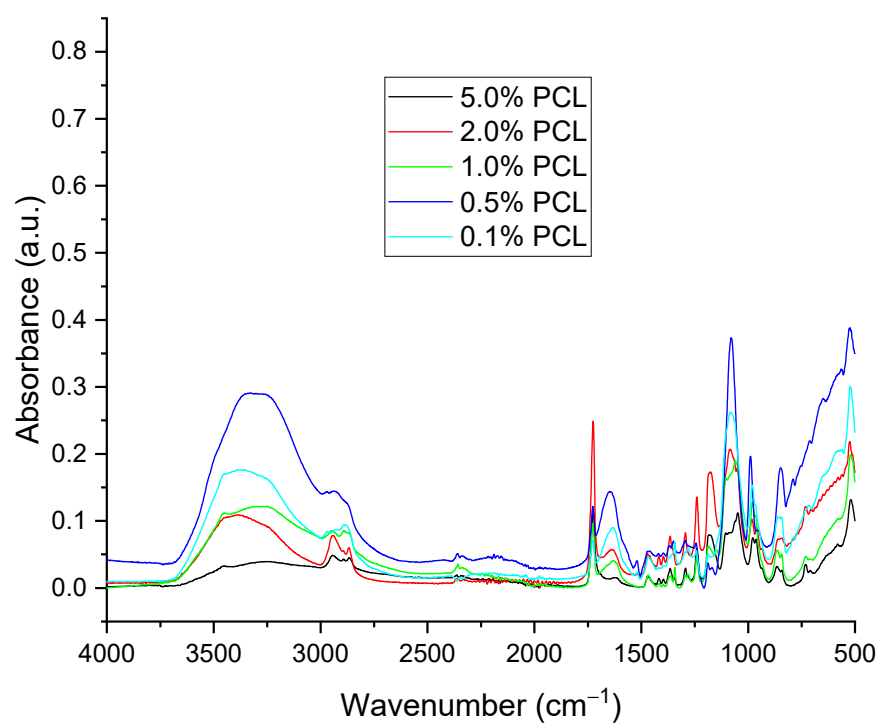

Figure S1. FTIR spectrum of dye-loaded NPs formulated with different amounts of PCL.
